# Supplementary material
Source: Research Square preprint supplement (doi:10.21203/rs.3.rs-9508769/v1)
Supplement: Supplementary file 1 [file 9f5562f4c10b6272f68c8a13.docx]

| **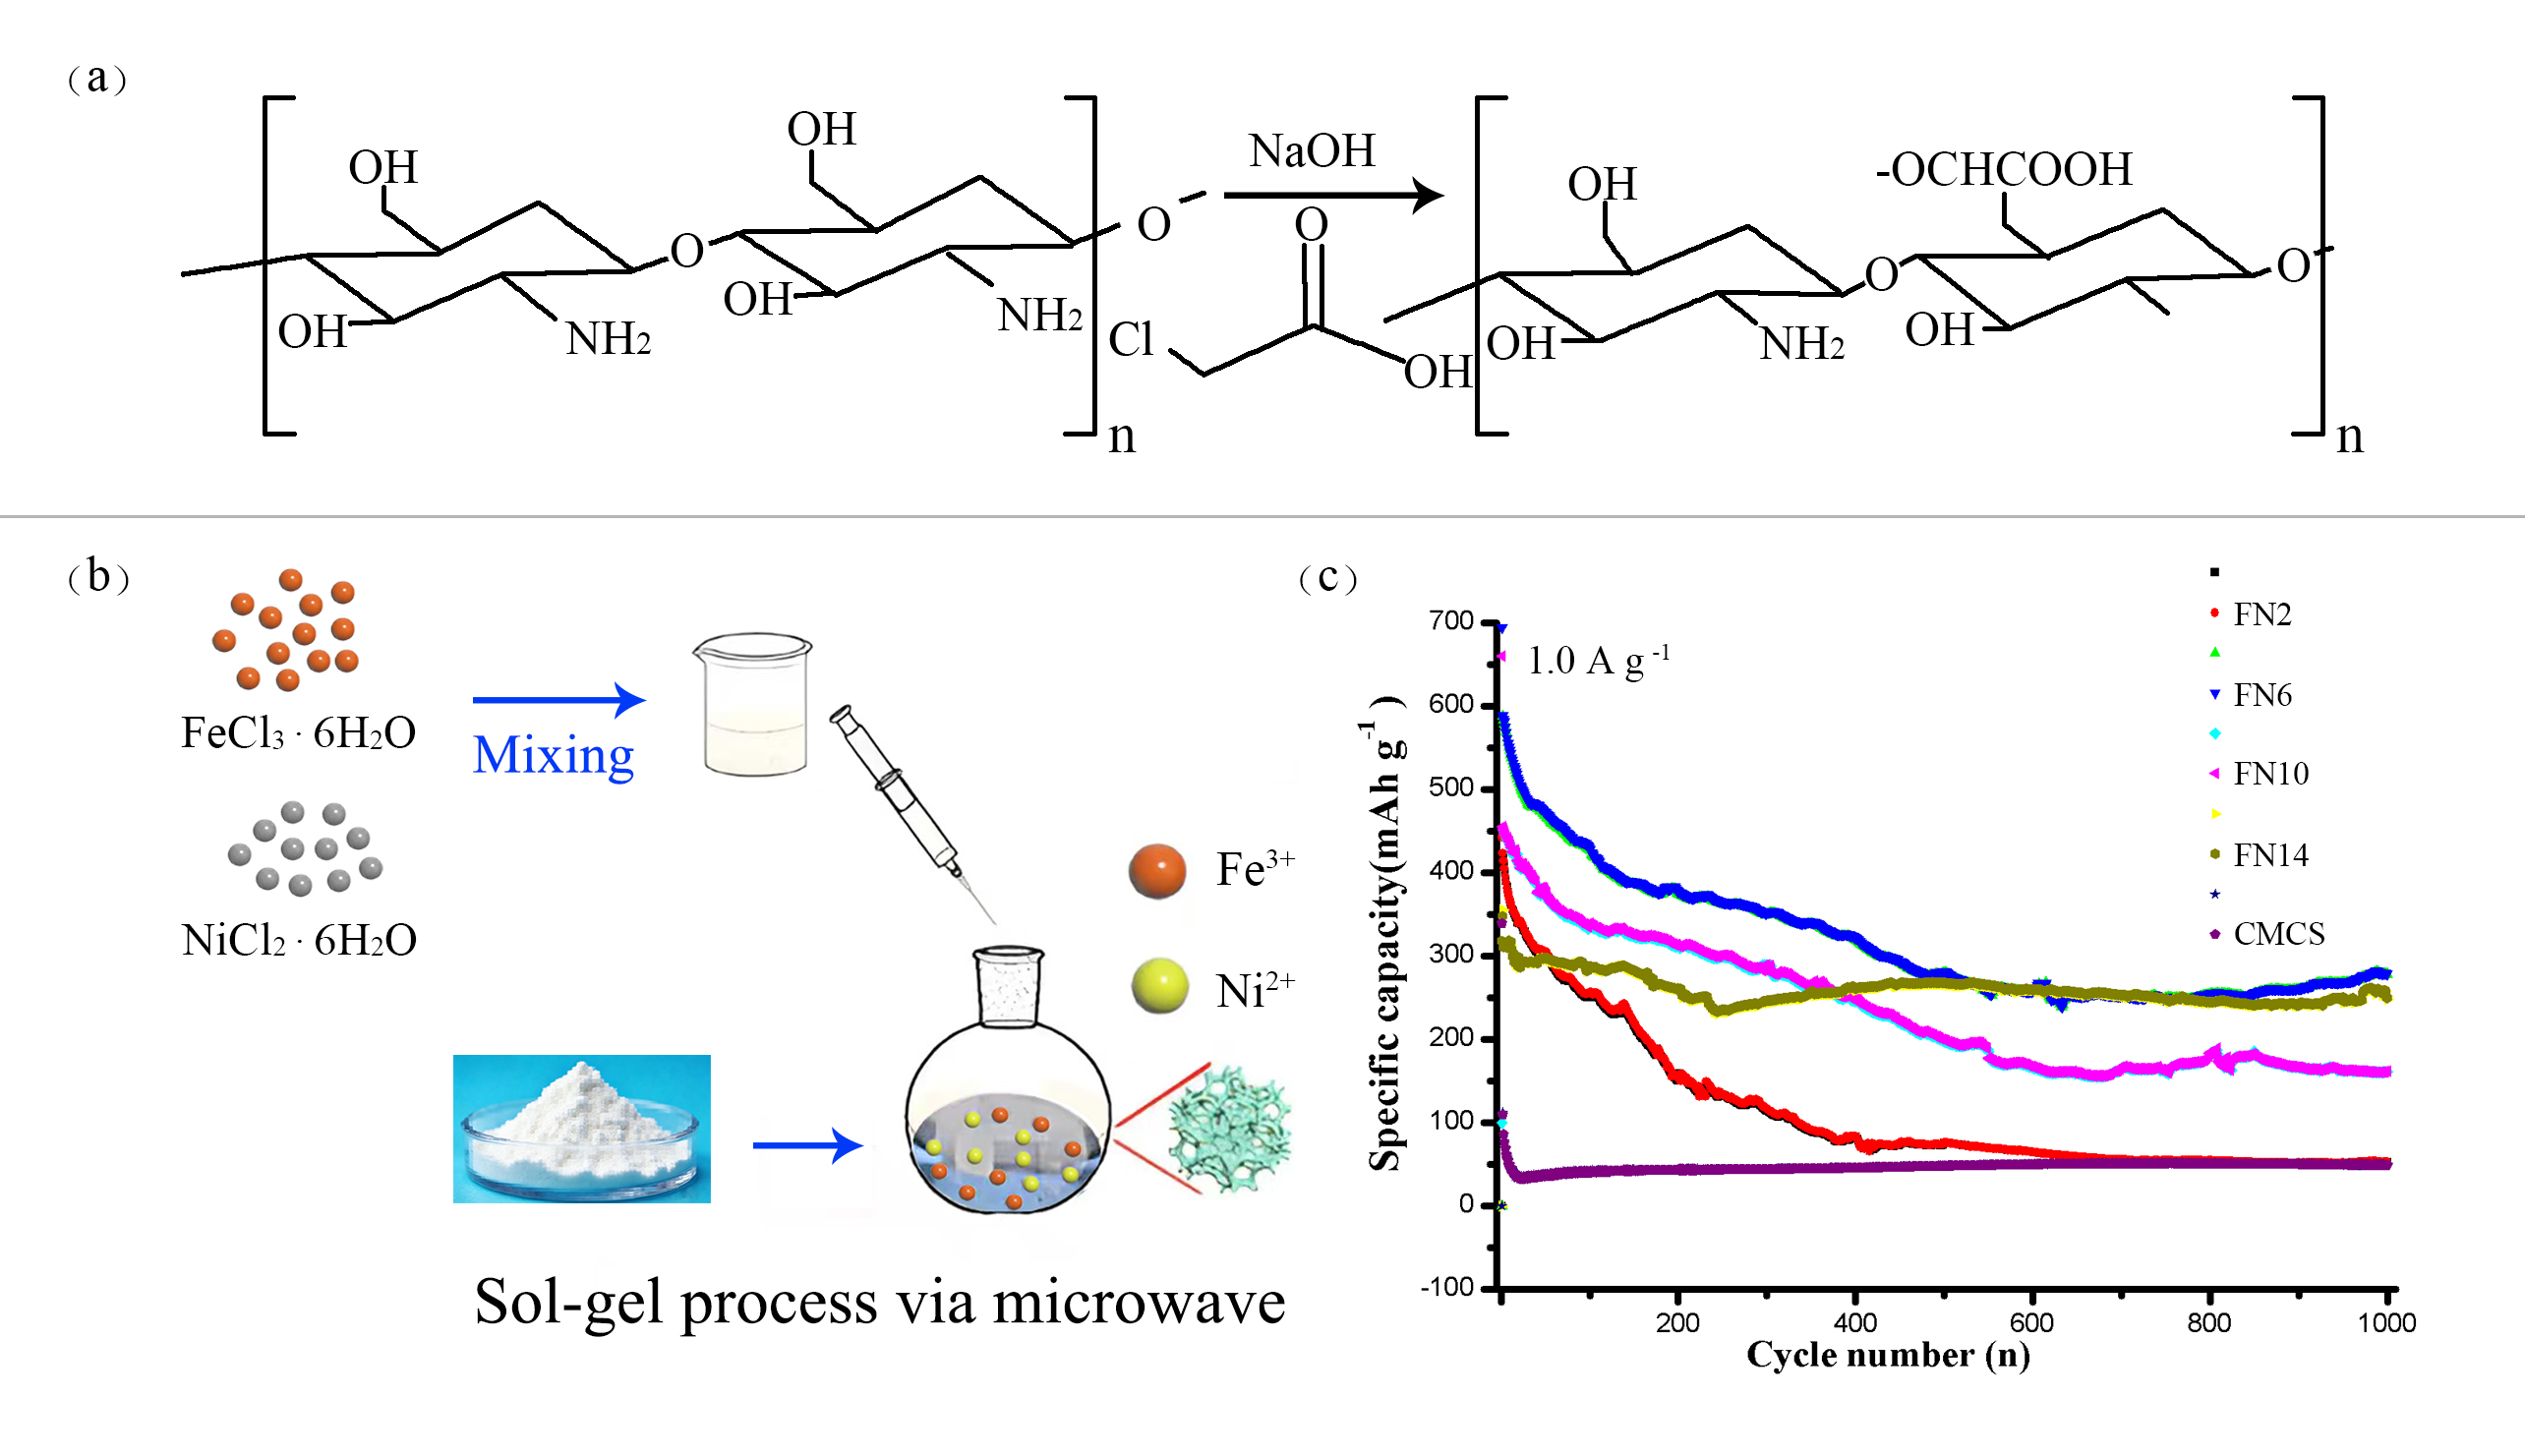** |  |
| --- | --- |

**Scheme 1.** Schematic illustration of the electrode materials preparation. (a) Schematic diagram of chemical reaction of chitosan modified with carboxylic groups, (b) preparation of electrode materials , and (c) cycle performance at 1.0 A g-1.
